# Supplementary material for: New Nanosized Systems Doxorubicin—Amphiphilic Copolymers of N-Vinylpyrrolidone and (Di)methacrylates with Antitumor Activity
Source: MDPI journal article supplement (doi:10.3390/pharmaceutics14122572), 2022-11-23
Supplement: s1 [file s1]

# New Nanosized Systems Doxorubicin – Amphiphilic Copolymers of *N*-Vinylpyrrolidone and (Di)methacrylates with Antitumor Activity

Svetlana V. Kurmaz <sup>1,\*</sup>, Vladislav M. Ignatiev <sup>1</sup>, Nina S. Emel'yanova <sup>1</sup>, Vladimir A. Kurmaz <sup>1</sup>, Dmitry V. Konev <sup>1</sup>, Anastasiya A. Balakina <sup>1</sup> and Alexey A. Terentyev <sup>1,2,3</sup>

<sup>1</sup> Federal Research Center of Problems of Chemical Physics and Medicinal Chemistry, Russian Academy of Sciences, ac. Semenov av. 1, 142432 Chernogolovka, Russia

<sup>2</sup> Faculty of Fundamental Physical and Chemical Engineering, Moscow State University M.V. Lomonosov, GSP-1, Leninskie Gory, 1, Building 51, 1 Educational Building, 119991 Moscow, Russia

<sup>3</sup> Scientific and Educational Center of the Moscow State Regional University, St. Vera Voloshina 24, 141014 Mytishchi, Russia

\* Correspondence: skurmaz@icp.ac.ru; Tel.: +7-496-522-10-89

Description of conditions for DOX encapsulation in the VP-TEGDM copolymer; Table S1: Concentrations of reagents and conditions for DOX encapsulation in the VP-TEGDM copolymer (CPL1) according to the manner 1, Table S2: Concentrations of reagents and conditions of DOX encapsulation into the VP-TEGDM copolymer according to the manner 2. Description of structure and properties of copolymers; Figure S1: Topological structures of VP-TEGDM (a) and VP-MAA-TEGDM (b) copolymers, Figure S2: The intensity distribution of light scattering over the size of scattering centers by a solution of the VP-TEGDM copolymer in IPA (7 mg mL<sup>-1</sup>) on temperature, Figure S3: The intensity distribution of light scattering over the size of scattering centers by an aqueous buffer solution of the VP-TEGDM copolymer (1.2 mg mL<sup>-1</sup>) on temperature. Description of an aqueous buffer solution of the DOX-copolymer, Figure S4: The intensity distribution of light scattering over the size of scattering centers by an aqueous buffer solution of DOX-the copolymer obtained in run 1 (a) (and run 2 (b) on temperature. The concentrations are 1.2 and 0.42 mg mL<sup>-1</sup>, resp., Figure S5: Absorption spectra of DOX (a) and DOX-terpolymer structure (b) in PBS (initial and over two weeks). Cuvette is 1 cm.

**Citation:** Kurmaz, S.V.; Ignatiev, V.M.; Emel'yanova, N.S.; Kurmaz, V.A.; Konev, D.V.; Balakina, A.A.; Terentyev, A.A. New Nanosized Systems Doxorubicin – Amphiphilic Copolymers of *N*-Vinylpyrrolidone and (di)Methacrylates with Antitumor Activity. *Pharmaceutics* **2022**, *14*, 2572. <https://doi.org/10.3390/pharmaceutics14122572>

Received: 29 September 2022

Accepted: 18 November 2022

Published: 23 November 2022

**Publisher's Note:** MDPI stays neutral with regard to jurisdictional claims in published maps and institutional affiliations.

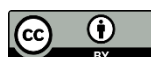

**Copyright:** © 2022 by the authors. Submitted for possible open access publication under the terms and conditions of the Creative Commons Attribution (CC BY) license (<https://creativecommons.org/licenses/by/4.0/>).

**Table S1.** Concentrations of reagents and conditions for DOX encapsulation in the VP-TEGDM copolymer (CPL1) according to the manner 1.

| # runs | Volume ratio of the CPL1 solutions in IPA and DOX in water, ml | [CPL1] <sub>0</sub> , mg ml <sup>-1</sup> | [DOX] <sub>0</sub> , mg ml <sup>-1</sup> | DOX content per CPL1, % | pH 0.01 M neutral water buffer solution |
|--------|----------------------------------------------------------------|-------------------------------------------|------------------------------------------|-------------------------|-----------------------------------------|
| 1      | 4:0.1                                                          | 7.0                                       | 1.0                                      | 0.4                     | 7.0                                     |
| 2      | 4:0.3                                                          | 7.0                                       | 1.0                                      | 1.1                     | 7.0                                     |
| 3      | 4:0.1                                                          | 0.0                                       | 1.0                                      | –                       | 7.0                                     |
| 4      | 4:0.0                                                          | 7.0                                       | 0.0                                      | –                       | 7.0                                     |
| 5      | 4:0.3                                                          | 7.0                                       | 0.0                                      | 0.0                     | 7.0                                     |
| 6      | 4:0.1                                                          | 7.0                                       | 1.0                                      | 0.4                     | 6.8                                     |
| 7      | 4:0.3                                                          | 1.5                                       | 1.0                                      | 5.0                     | 6.8                                     |
| 8      | 4:0.3                                                          | 0.5                                       | 1.0                                      | 15.0                    | 6.8                                     |

**Table S2.** Concentrations of reagents and conditions for DOX encapsulation in the VP-TEGDM copolymer (CPL1) according to the manner 2.

| # runs | Volume ratio of the CPL1 solutions in IPA and DOX in water, ml | [CPL1] <sub>0</sub> , mg ml <sup>-1</sup> | [DOX] <sub>0</sub> , mg ml <sup>-1</sup> | DOX content per CPL1, % | pH 0.01 M neutral water buffer solution |
|--------|----------------------------------------------------------------|-------------------------------------------|------------------------------------------|-------------------------|-----------------------------------------|
| 9      | 4:0.1                                                          | 0.0625                                    | 1.0                                      | 40                      | 7.0                                     |
| 10     | 4:0.1                                                          | 0.1250                                    | 1.0                                      | 20                      | 7.0                                     |
| 11     | 4:0.1                                                          | 0.2500                                    | 1.0                                      | 10                      | 7.0                                     |
| 12     | 4:0.1                                                          | 0.5000                                    | 1.0                                      | 5                       | 7.0                                     |
| 13     | 4:0.1                                                          | 1.000                                     | 1.0                                      | 2.5                     | 7.0                                     |

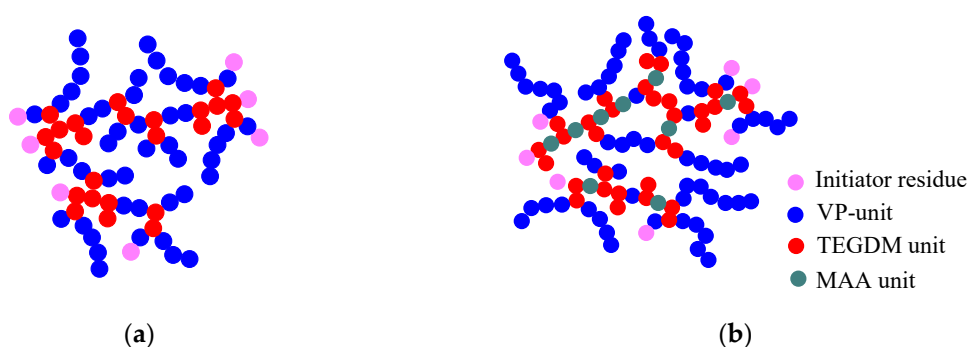**Figure S1.** Topological structures of VP-TEGDM (a) and VP-MAA-TEGDM (b) copolymers.

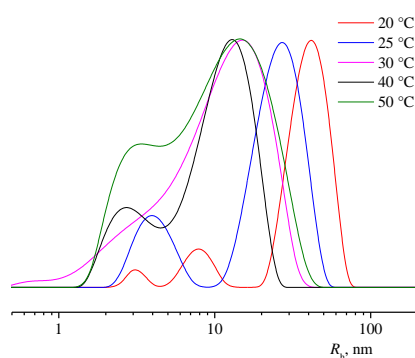

**Figure S2.** The intensity distribution of light scattering over the size of scattering centers by a solution of the VP-TEGDM copolymer in IPA ( $7 \text{ mg mL}^{-1}$ ) at different temperatures.

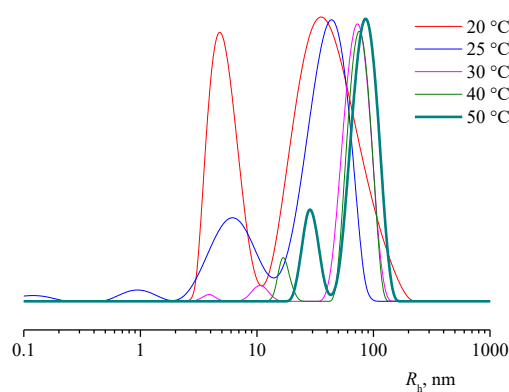

**Figure S3.** The intensity distribution of light scattering over the size of scattering centers by PBS (pH 7.0) of the VP-TEGDM copolymer ( $1.2 \text{ mg mL}^{-1}$ ) at different temperatures.

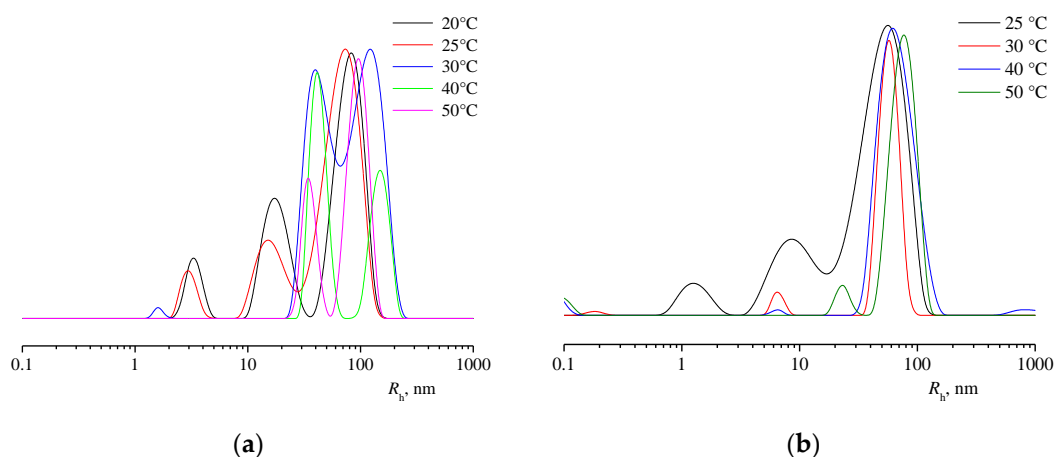

**Figure S4.** The intensity distribution of light scattering over the size of scattering centers by PBS (pH 7.0) of DOX-copolymer compositions obtained in run 1 (a) and run 2 (b) at different temperatures. The concentrations are  $1.2$  and  $0.42 \text{ mg mL}^{-1}$ , resp.

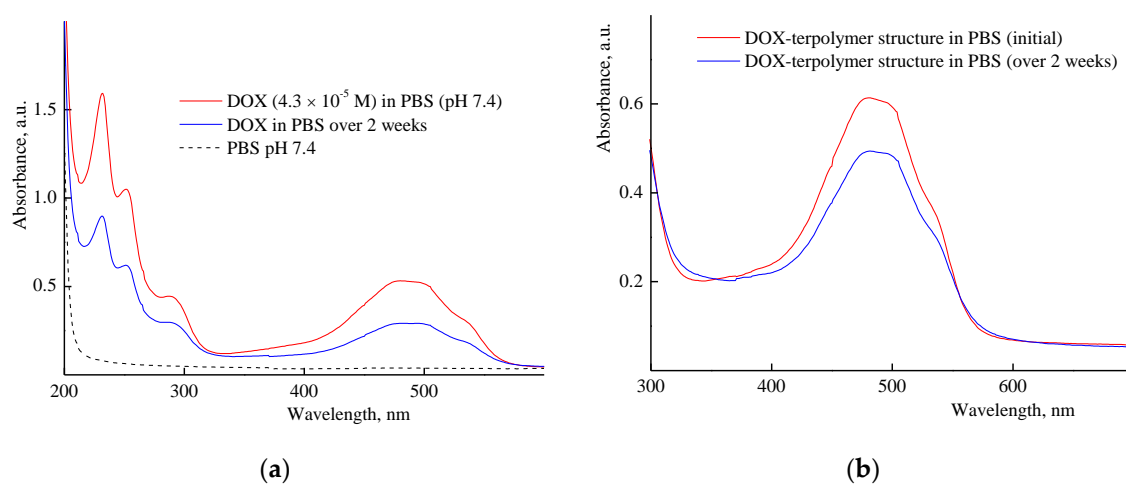

**Figure S5.** Absorption spectra of DOX (a) and DOX-terpolymer structure (b) in PBS (initial and over two weeks). Cuvette is 1 cm.
